# Supplementary material
Source: ML conference proceedings conference paper supplement (https://proceedings.neurips.cc/paper_files/paper/2014/hash/2b8a61594b1f4c4db0902a8a395ced93-Abstract.html)
Supplement: Supplementary file [file 2b8a61594b1f4c4db0902a8a395ced93-Supplemental.zip]

---

# Supplement for Optimal decision-making with time-varying reliability

---

**Jan Drugowitsch<sup>1</sup>**

<sup>1</sup>Dépt. des Neurosciences Fondamentales  
Université de Genève  
CH-1211 Genève 4, Switzerland  
jdrugow@gmail.com,  
alexandre.pouget@unige.ch

**Rubén Moreno-Bote<sup>2</sup>**

<sup>2</sup>Research Unit, Parc Sanitari  
Sant Joan de Déu and  
University of Barcelona  
08950 Barcelona, Spain  
rmoreno@fsjd.org

**Alexandre Pouget<sup>1</sup>**

## 1 The generative model

Within a single trial, a binary hidden variable  $z \in \{-1, 1\}$  (with units  $s^{-1}$ , if time is measured in seconds) generates a stream of momentary evidence  $dx(t)$ ,  $t \geq 0$ , by

$$dx = zdt + \frac{1}{\sqrt{\tau(t)}}dW, \quad \text{where } d\tau = \eta(\mu - \tau)dt + \sigma\sqrt{\frac{2\eta}{\mu}}\sqrt{\tau}dB, \quad (1)$$

where  $dW$  and  $dB$  are independent Wiener processes. The *reliability*  $\tau(t)$  controls how informative the *momentary evidence*  $dx(t)$  is about  $z$ .  $\tau(t)$  follows the Cox-Ingersoll-Ross (CIR) process with mean  $\mu$ , standard deviation  $\sigma$ , and speed  $\eta$ , and has a gamma steady-state distribution with shape  $\mu^2/\sigma^2$  and scale  $\sigma^2/\mu$  [1].

## 2 Inferring $\tau(t)$ from momentary evidence

It is possible to infer the reliability,  $\tau(t)$ , instantaneously by making observations of the diffusion process,  $x(t)$ . To show this, consider the discretization of this diffusion process  $\delta x_n = z\delta t + \zeta_n\sqrt{\delta t}\eta_n$ , where  $\delta t$  is a very small time interval,  $\zeta_n^2 = \zeta^2(n\delta t) = \tau(n\delta t)^{-1}$  is a time-dependent variance (inverse of the time-dependent reliability evaluated at  $t = n\delta t$ ), and  $\eta_n$  is a zero-mean unit-variance normal random variable independent across time. Now, let us consider the square of the steps  $\delta x_n$ , which takes the form  $\delta x_n^2 = z^2\delta t^2 + \zeta_n^2\delta t\eta_n^2 + 2z\zeta_n\sqrt{\delta t^3}\eta_n$ . To estimate the variance  $\zeta^2(t)$  we will need to know the following moments of the squared process:

$$\langle \delta x_n^2 \rangle = \zeta_n^2\delta t + \mathcal{O}(\delta t^2), \quad (2)$$

$$\text{var}(\delta x_n^2) = 2\zeta_n^4\delta t^2 + \mathcal{O}(\delta t^3), \quad (3)$$

$$\langle \delta x_n^2 \delta x_m^2 \rangle = \zeta_n^2\zeta_m^2\delta t^2 + \mathcal{O}(\delta t^3), \quad (4)$$

where we have used  $\langle \eta_n^2 \rangle = \langle \eta_n^2 \eta_m^2 \rangle = 1$  and  $\langle \eta_n^4 \rangle = 3$ , and averages  $\langle \cdot \rangle$  are respect to the process  $dW$  in (Eq. 1) (equivalently respect to the  $\eta_n$ s), and not respect to  $dB$ .

Let us consider the estimator  $y(t) = \sum_{n=1}^N \delta x_n^2$ , where the time window  $t$  has been split into  $N$  equal infinitesimal intervals of length  $\delta t$ . This estimator has moments

$$\langle y(t) \rangle = \delta t \sum_{n=1}^N \zeta_n^2 + \mathcal{O}(\delta t) \xrightarrow{\delta t \rightarrow 0} \int_0^t \zeta^2(s) ds, \quad (5)$$

$$\begin{aligned} \text{var}(y(t)) &= \sum_{n=1}^N \langle \delta x_n^4 \rangle + \sum_{mn} \langle \delta x_n^2 \delta x_m^2 \rangle - \langle y \rangle^2 \\ &\xrightarrow{\delta t \rightarrow 0} \iint_0^t \zeta^2(s_1) \zeta^2(s_2) ds_1 ds_2 - \left( \int_0^t \zeta^2(s) ds \right)^2 = 0, \end{aligned} \quad (6)$$

where we have used  $t = N\delta t$ , and the fact that averages are only with respect to the diffusion process, not respect to trajectories of  $\zeta^2(t)$ . Since  $y(t)$  is a continuous and differentiable deterministic function of the path of  $\zeta^2(t)$ , the estimator can be used to give infinitely precise estimates of the variance of the underlying process simply by taking the temporal derivative:

$$\frac{d}{dt} y(t) = \zeta^2(t) = \frac{1}{\tau(t)}. \quad (7)$$

It is important that in the definition of  $y(t)$  we do not assume that  $\tau(t)$  is constant. However, when computing mean and variance of  $y(t)$  across  $dW$ , we do use the fact that the samples of  $dW$  are i.i.d (which is true by construction, Eq. (1)). In addition, in the derivation of the mean and variance of  $y(t)$  we do not use that the samples of  $\tau(t)$  are i.i.d, as we do not take the average over the process  $\tau(t)$  (equivalently over  $dB$ ).

Intuitively,  $\tau(t)$  is a continuous process (see Eq. (1)), and therefore there is a finite time resolution  $T$  below which  $\tau(t)$  can be considered approximately constant. Within that time resolution, one can discretize time with infinitesimally small increments  $\delta t$  and get as many samples of  $dW$  as desired (i.i.d. by definition, see Eq. (1)). From these samples one can estimate with arbitrarily high precision the reliability  $\tau(t)$  of the process, as formally shown above.

There is a single case in which the argument presented above breaks down: consider the limit in which the volatility is infinity ( $\eta = 0$  and pre-factor of  $dB$  in Eq. (1) constant). In this case,  $\tau(t)$  is not a continuous process, and then  $y(t)$  has a discontinuous derivative. Only in this unrealistic case  $\tau(t)$  cannot be estimated with infinite precision.

### 3 Inferring the latent $z$

To infer  $z$ , we again consider the discretization of the particle diffusion process  $\delta x_n \sim \mathcal{N}(z\delta t, \tau_n^{-1}\delta t)$ , which is normal with mean  $z\delta t$  and variance  $\tau_n^{-1}\delta t$ . Then, assuming a uniform prior on  $z$ , that is  $p(z) \propto_z 1$ , the posterior  $z$  is proportional to

$$\begin{aligned} p(z|\delta x_{0:t}) &\propto_z \prod_n \mathcal{N}(\delta x_n | z\delta t, \tau_n^{-1}\delta t) \\ &\propto_z e^{-\sum_n \frac{\tau_n(\delta x_n - z\delta t)^2}{2\delta t}} \\ &\propto_z e^{-\frac{z^2}{2} \sum_n \delta t \tau_n + zX(t)} \end{aligned} \quad (8)$$

where  $\delta x_{0:t}$  denotes all momentary evidence until time  $t$ , and we have defined  $X(t) = \sum_n \tau_n \delta x_n$ . Adding the appropriate normalization constant, which is the above summed over  $z = 1$  and  $z = -1$ , causes the terms containing  $z^2$  to cancel. When taking  $\delta t \rightarrow 0$ , this results in the posterior belief to be given by

$$g(t) \equiv p(z = 1 | \delta x_{0:t}) = \frac{1}{1 + e^{-2X(t)}}, \quad \text{where } X(t) = \int_0^t \tau(s) dx(s). \quad (9)$$

This belief is valid even for the case of a bounded accumulation of evidence, as the introduction of such boundaries does not change the sufficient statistics,  $X(t)$  [2, 3].

## 4 Finding the expected future return by solving a PDE

The expected future return  $\langle V(g + \delta g, \tau + \delta \tau) \rangle_{p(\delta g, \delta \tau | g, \tau)}$  can be found by the solution to a partial differential equation (PDE). To do so, we define  $u(g, \tau, t) \equiv V(g, \tau)$  and  $u(g, \tau, t + \delta t) \equiv \langle V(g + \delta g, \tau + \delta \tau) \rangle$ , and replace this expectation by its second-order Taylor expansion around  $(g, \tau)$ . Then, we find that, with  $\delta t \rightarrow 0$ , we have

$$\frac{\partial u}{\partial t} = \left( \frac{\langle dg \rangle}{dt} \frac{\partial}{\partial g} + \frac{\langle d\tau \rangle}{dt} \frac{\partial}{\partial \tau} + \frac{\langle dg^2 \rangle}{2dt} \frac{\partial^2}{\partial g^2} + \frac{\langle d\tau^2 \rangle}{2dt} \frac{\partial^2}{\partial \tau^2} + \frac{\langle dg d\tau \rangle}{dt} \frac{\partial^2}{\partial g \partial \tau} \right) u, \quad (10)$$

with all expectations implicitly conditional on  $g$  and  $\tau$ . The above allows us to find  $u(g, \tau, t + \delta t)$  for some known  $u(g, \tau)$ .

The boundary conditions at  $g \in \{0, 1\}$  are  $u(g, \tau, t) = V_d(g) = 1$  for all  $t$ , where  $V_d = \max\{g, 1 - g\}$ . For  $\tau \rightarrow \infty$  we have  $u(g, \tau, t) = 1$  for all  $t$ . At  $\tau = 0$ , all infinitesimal moments except for  $\langle d\tau \rangle = \eta \mu dt$  are zero, such that we have a deterministic flow towards  $\tau > 0$ . The main text justifies the use of these boundary conditions.

### 4.1 The infinitesimal moments of $g$ and $\tau$

The infinitesimal moments of  $\tau$  are, by the definition of the generative model, Eq. (1), given by

$$\langle d\tau | g, \tau \rangle = \eta (\mu - \tau) dt, \quad (11)$$

$$\langle d\tau^2 | g, \tau \rangle = \frac{2\eta\sigma^2}{\mu} \tau dt, \quad (12)$$

where we have only retained terms of  $\mathcal{O}(dt)$ . The moments of  $g$  are found by assuming a small time step  $\delta t$  in which  $\delta X_n = \tau_n (z\delta t + \tau_n^{-1/2} \delta t^{1/2} \eta_n)$ , where  $\eta_n$  is a zero-mean unit-variance normal random variable. To find  $\delta g_n$ , we approximate the mapping from  $X(t)$  to  $g(t)$  (Eq. 9)) by a second-order Taylor series expansion around  $X_n$  to find

$$\delta g_n = 2(1 - g_n)g_n (\tau_n z\delta t + \sqrt{\tau_n \delta t} \eta_n) - 2(1 - g_n)g_n(2g_n - 1) (\tau_n z\delta t + \sqrt{\tau_n \delta t} \eta_n)^2. \quad (13)$$

Taking  $\delta t \rightarrow 0$  and only retaining terms of  $\mathcal{O}(dt)$  results in the moments

$$\langle dg | g, \tau \rangle = 0, \quad (14)$$

$$\langle dg^2 | g, \tau \rangle = 4(1 - g)^2 g^2 \tau dt, \quad (15)$$

$$\langle dg d\tau | g, \tau \rangle = 0. \quad (16)$$

### 4.2 Solving the PDE by the Alternating Direction Implicit method

Having  $\langle dg d\tau | g, \tau \rangle = 0$  allows us to use the Alternating Direction Implicit (ADI) method to solve the above PDE. To do so, we discretize  $u(g, \tau, \cdot)$  on a grid  $g_1, \dots, g_K$  in steps of  $\Delta_g$  for  $g$ , and  $\tau_1, \dots, \tau_J$  in steps of  $\Delta_\tau$  for  $\tau$ . We set  $g_1 = 0$  and  $g_K = 1$  for the belief, and  $\tau_1 = 0$  and  $\tau_J$  to twice the 99th percentile of the steady-state distribution of  $\tau$ . Furthermore, we define  $u_{kj}^n \equiv u(g_k, \tau_j, t)$  and  $u_{kj}^{n+1} \equiv u(g_k, \tau_j, t + dt)$ . Then, the above PDE, Eq. (10), can be solved by the ADI method [4] in two steps,

$$u_{kj}^{n+\frac{1}{2}} - u_{kj}^n = \frac{\delta t}{2} \left( \frac{\langle \delta g \rangle}{\delta t} \frac{\partial}{\partial g} + \frac{\langle \delta g^2 \rangle}{2\delta t} \frac{\partial^2}{\partial g^2} \right) u_{kj}^{n+\frac{1}{2}} + \frac{\delta t}{2} \left( \frac{\langle \delta \tau \rangle}{\delta t} \frac{\partial}{\partial \tau} + \frac{\langle \delta \tau^2 \rangle}{2\delta t} \frac{\partial^2}{\partial \tau^2} \right) u_{kj}^n, \quad (17)$$

$$u_{kj}^{n+1} - u_{kj}^{n+\frac{1}{2}} = \frac{\delta t}{2} \left( \frac{\langle \delta g \rangle}{\delta t} \frac{\partial}{\partial g} + \frac{\langle \delta g^2 \rangle}{2\delta t} \frac{\partial^2}{\partial g^2} \right) u_{kj}^{n+\frac{1}{2}} + \frac{\delta t}{2} \left( \frac{\langle \delta \tau \rangle}{\delta t} \frac{\partial}{\partial \tau} + \frac{\langle \delta \tau^2 \rangle}{2\delta t} \frac{\partial^2}{\partial \tau^2} \right) u_{kj}^{n+\frac{1}{2}} \quad (18)$$

where  $\delta t$  is the time discretization. For all  $k, j$ , and  $n$  but the boundary at  $\tau = 0$ , the derivatives are approximated by the central finite differences

$$\frac{\partial}{\partial g} u_{kj} \approx \frac{u_{k+1,j} - u_{k-1,j}}{2\Delta_g}, \quad (19)$$

$$\frac{\partial^2}{\partial g^2} u_{kj} \approx \frac{u_{k+1,j} - 2u_{kj} + u_{k-1,j}}{\Delta_g^2}, \quad (20)$$

$$\frac{\partial}{\partial \tau} u_{kj} \approx \frac{u_{k,j+1} - u_{k,j-1}}{2\Delta_\tau}, \quad (21)$$

$$\frac{\partial^2}{\partial \tau^2} u_{kj} \approx \frac{u_{k,j+1} - 2u_{kj} + u_{k,j-1}}{\Delta_\tau^2}. \quad (22)$$

At  $\tau = 0$ , the only required derivative is  $\partial u / \partial \tau$ , which we approximate by the right finite difference,

$$\frac{\partial}{\partial \tau} u_{k1} \approx \frac{u_{k2} - u_{k1}}{\Delta_\tau}. \quad (23)$$

In the next two subsections, we deal with computing  $u^{n+\frac{1}{2}}$  from  $u^n$ , and then computing  $u^{n+1}$  from  $u^{n+\frac{1}{2}}$ , separately. In both cases, the computation time is of order  $\mathcal{O}(KJ)$ , such that the expected return can be computed in time linear in the discretization of the  $(g, \tau)$  space.

### 4.3 Moving from $n$ to $n + \frac{1}{2}$

Equation (17) can for all  $j = 1, \dots, J$  be written as the linear system

$$\mathbf{L}_j^{n+\frac{1}{2}} \mathbf{u}_j^{n+\frac{1}{2}} = \mathbf{b}_j^n, \quad (24)$$

where  $\mathbf{u}_j^{n+\frac{1}{2}}$  is a column vector with  $K$  elements  $(u_{1,j}^{n+\frac{1}{2}}, \dots, u_{K,j}^{n+\frac{1}{2}})$ ,  $\mathbf{b}_j^n$  is a vector of the same size, and  $\mathbf{L}_j^{n+\frac{1}{2}}$  is a tri-diagonal  $K \times K$  matrix. Thus, the above system can for each  $j$  be solved for  $\mathbf{u}_j^{n+\frac{1}{2}}$  in  $\mathcal{O}(K)$  time, thus leading to an overall computational time complexity  $\mathcal{O}(KJ)$ .

For  $2 \leq j \leq J$ , the matrices  $\mathbf{L}_j^{n+\frac{1}{2}}$  have elements

$$\left(\mathbf{L}_j^{n+\frac{1}{2}}\right)_{km} = \begin{cases} 1 + \frac{\delta t}{2\Delta_g^2} \frac{\langle \delta g^2 \rangle}{\delta t} & \text{if } m = k \text{ for } 2 \leq k \leq K-1, \\ -\frac{\delta t}{4\Delta_g} \frac{\langle \delta g \rangle}{\delta t} - \frac{\delta t}{4\Delta_g^2} \frac{\langle \delta g^2 \rangle}{\delta t} & \text{if } m = k+1 \text{ for } 2 \leq k \leq K-1, \\ \frac{\delta t}{4\Delta_g} \frac{\langle \delta g \rangle}{\delta t} - \frac{\delta t}{4\Delta_g^2} \frac{\langle \delta g^2 \rangle}{\delta t} & \text{if } m = k-1 \text{ for } 2 \leq k \leq K-1, \\ 1 & \text{if } k = m \text{ for } k \in \{1, K\}, \\ 0 & \text{otherwise.} \end{cases} \quad (25)$$

In the above, the first three lines specify the diagonal, upper diagonal, and lower diagonal, respectively. The fourth line is responsible for the boundary condition at the  $k \in \{1, K\}$  boundary. The associated vectors  $\mathbf{b}_j^n$  have elements

$$(\mathbf{b}_j^n)_k = \left(1 - \frac{\delta t}{2\Delta_\tau^2} \frac{\langle \delta \tau^2 \rangle}{\delta t}\right) u_{kj}^n + \left(\frac{\delta t}{4\Delta_\tau} \frac{\langle \delta \tau \rangle}{\delta t} - \frac{\delta t}{4\Delta_\tau^2} \frac{\langle \delta \tau^2 \rangle}{\delta t}\right) u_{k,j+1}^n + \left(-\frac{\delta t}{4\Delta_\tau} \frac{\langle \delta \tau \rangle}{\delta t} + \frac{\delta t}{4\Delta_\tau^2} \frac{\langle \delta \tau^2 \rangle}{\delta t}\right) u_{k,j-1}^n, \quad (26)$$

for all  $2 \leq k \leq K-1$  and are set to  $(\mathbf{b}_j^n)_k = u_{kj}^n$  otherwise. For the  $\tau$  boundaries at  $j \in \{1, J\}$ ,  $\mathbf{L}_j^{n+\frac{1}{2}}$  is set to  $\mathbf{L}_j^{n+\frac{1}{2}} = \mathbf{I}$ . At  $j = 0$  (corresponding to  $\tau = 0$ ),  $\mathbf{b}_1^n$  has elements

$$(\mathbf{b}_1^n)_k = \left(1 - \frac{\delta t}{2\Delta_\tau} \frac{\langle \delta \tau \rangle}{\delta t}\right) u_{k1}^n + \frac{\delta t}{2} \frac{\langle \delta \tau \rangle}{\delta t} u_{k2}^n, \quad (27)$$

for  $2 \leq k \leq K-1$ , and is set to  $(\mathbf{b}_1^n)_k = u_{k1}^n$  otherwise. At  $j = J$ , all elements of  $\mathbf{b}_J^n$  are set to  $(\mathbf{b}_J^n)_k = u_{kJ}^n$  to obey the boundary condition at  $j = J$ .

#### 4.4 Moving from $n + \frac{1}{2}$ to $n + 1$

Equation (18) can for all  $k = 1, \dots, K$  be written as the linear system

$$\mathbf{L}_k^{n+1} \mathbf{u}_k^{n+1} = \mathbf{b}_k^{n+\frac{1}{2}}, \quad (28)$$

where  $\mathbf{u}_k^{n+1}$  is a column vector with  $J$  elements  $(u_{k,1}^{n+1}, \dots, u_{k,J}^{n+1})$ ,  $\mathbf{b}_k^{n+\frac{1}{2}}$  is a vector of the same size, and  $\mathbf{L}_k^{n+1}$  is a tri-diagonal  $J \times J$  matrix. Thus, the above system can for each  $k$  be solved for  $\mathbf{u}_k^{n+1}$  in  $\mathcal{O}(J)$  time, thus leading to an overall computational time complexity  $\mathcal{O}(KJ)$ .

For  $2 \leq j \leq J - 1$ , the matrices  $\mathbf{L}_k^{n+1}$  have elements

$$(\mathbf{L}_k^{n+1})_{jn} = \begin{cases} 1 + \frac{\delta t}{2\Delta_\tau^2} \frac{\langle \delta \tau^2 \rangle}{\delta t} & \text{if } n = j \text{ for } 2 \leq j \leq J - 1, \\ -\frac{\delta t}{4\Delta_\tau} \frac{\langle \delta \tau \rangle}{\delta t} - \frac{\delta t}{4\Delta_\tau^2} \frac{\langle \delta \tau^2 \rangle}{\delta t} & \text{if } n = j + 1 \text{ for } 2 \leq j \leq J - 1, \\ \frac{\delta t}{4\Delta_\tau} \frac{\langle \delta \tau \rangle}{\delta t} - \frac{\delta t}{4\Delta_\tau^2} \frac{\langle \delta \tau^2 \rangle}{\delta t} & \text{if } n = j - 1 \text{ for } 2 \leq j \leq J - 1, \\ 1 + \frac{\delta t}{2\Delta_\tau} \frac{\langle \delta \tau \rangle}{\delta t} & \text{if } j = n = 1, \\ -\frac{\delta t}{2\Delta_\tau} \frac{\langle \delta \tau \rangle}{\delta t} & \text{if } j = 1, n = 2, \\ 1 & \text{if } j = n = J, \\ 0 & \text{otherwise.} \end{cases} \quad (29)$$

In the above, the first three lines specify the diagonal, upper diagonal, and lower diagonal, respectively. The fourth and fifth line follow from the boundary condition at  $j = 1$ . The sixth line follows from the boundary condition at  $j = J$ . The associated vectors  $\mathbf{b}_k^{n+\frac{1}{2}}$  have elements

$$\begin{aligned} (\mathbf{b}_k^{n+\frac{1}{2}})_j &= \left(1 - \frac{\delta t}{2\Delta_g^2} \frac{\langle \delta g^2 \rangle}{\delta t}\right) u_{kj}^{n+\frac{1}{2}} + \\ &\quad \left(\frac{\delta t}{4\Delta_g} \frac{\langle \delta g \rangle}{\delta t} + \frac{\delta t}{4\Delta_g^2} \frac{\langle \delta g^2 \rangle}{\delta t}\right) u_{k+1,j}^{n+\frac{1}{2}} + \left(-\frac{\delta t}{4\Delta_g} \frac{\langle \delta g \rangle}{\delta t} + \frac{\delta t}{4\Delta_g^2} \frac{\langle \delta g^2 \rangle}{\delta t}\right) u_{k-1,j}^{n+\frac{1}{2}} \end{aligned} \quad (30)$$

for all  $2 \leq j \leq J - 1$ , and  $(\mathbf{b}_k^{n+\frac{1}{2}})_j = u_{kj}^{n+\frac{1}{2}}$  otherwise. Due to the boundary conditions at  $k \in \{1, K\}$  we have  $\mathbf{L}_k^{n+1} = \mathbf{I}$  for both  $k$ 's, and associated  $(\mathbf{b}_k^{n+\frac{1}{2}})_j = u_{kj}^{n+\frac{1}{2}}$  for all  $j$ .

## References

- [1] John C. Cox, Jonathan E. Ingersoll Jr., and Stephen A. Ross. A theory of the term structure of interest rates. *Econometrica*, 53(2):385–408, 1985.
- [2] Rubén Moreno-Bote. Decision confidence and uncertainty in diffusion models with partially correlated neuronal integrators. *Neural Computation*, 22:1786–1811, 2010.
- [3] Jan Drugowitsch, Rubén Moreno-Bote, Anne K. Churchland, Michael N. Shadlen, and Alexandre Pouget. The cost of accumulating evidence in perceptual decision making. *The Journal of Neuroscience*, 32(11):3612–3628, 2012.
- [4] William H. Press, Saul A. Teukolsky, William T. Vetterling, and Brian P. Flannery. *Numerical Recipes: The Art of Scientific Computing*. Cambridge University Press, 3rd edition, 2007.
